# Supplementary material for: Persistence of Adverse Drug Reaction-Related Hospitalization Risk Following Discharge
Source: MDPI journal article supplement (doi:10.3390/ijerph19095585), 2022-05-04
Supplement: s1 [file s1]

**Supplementary Material Table S2. R Packages used for data analysis**

| Package    | Reference                                                                                                                                                                                                                                                                                                                                                                                                                                                                                                            |
|------------|----------------------------------------------------------------------------------------------------------------------------------------------------------------------------------------------------------------------------------------------------------------------------------------------------------------------------------------------------------------------------------------------------------------------------------------------------------------------------------------------------------------------|
| stringr    | Hadley Wickham (2019). stringr: Simple, Consistent Wrappers for Common String Operations. R package version 1.4.0.<br><a href="https://CRAN.R-project.org/package=stringr">https://CRAN.R-project.org/package=stringr</a>                                                                                                                                                                                                                                                                                            |
| plyr       | Hadley Wickham (2011). The Split-Apply-Combine Strategy for Data Analysis. Journal of Statistical Software, 40(1), 1-29.<br><a href="http://www.jstatsoft.org/v40/i01/">http://www.jstatsoft.org/v40/i01/</a> .                                                                                                                                                                                                                                                                                                      |
| dplyr      | Hadley Wickham, Romain François, Lionel Henry and Kirill Müller (2019). dplyr: A Grammar of Data Manipulation. R package version 0.8.0.1.<br><a href="https://CRAN.R-project.org/package=dplyr">https://CRAN.R-project.org/package=dplyr</a>                                                                                                                                                                                                                                                                         |
| data.table | Matt Dowle and Arun Srinivasan (2019). data.table: Extension of 'data.frame'. R package version 1.12.2.<br><a href="https://CRAN.R-project.org/package=data.table">https://CRAN.R-project.org/package=data.table</a>                                                                                                                                                                                                                                                                                                 |
| tidyr      | Hadley Wickham and Lionel Henry (2019). tidyr: Easily Tidy Data with 'spread()' and 'gather()' Functions. R package version 0.8.3.<br><a href="https://CRAN.R-project.org/package=tidyr">https://CRAN.R-project.org/package=tidyr</a>                                                                                                                                                                                                                                                                                |
| ggplot2    | H. Wickham. ggplot2: Elegant Graphics for Data Analysis. Springer-Verlag New York, 2016.                                                                                                                                                                                                                                                                                                                                                                                                                             |
| survminer  | Alboukadel Kassambara, Marcin Kosinski and Przemyslaw Biecek (2019). survminer: Drawing Survival Curves using 'ggplot2'. R package version 0.4.5.<br><a href="https://CRAN.R-project.org/package=survminer">https://CRAN.R-project.org/package=survminer</a>                                                                                                                                                                                                                                                         |
| survival   | Therneau T (2015). _A Package for Survival Analysis in S_. version 2.38, <a href="https://CRAN.R-project.org/package=survival">https://CRAN.R-project.org/package=survival</a><br>Terry M. Therneau, Patricia M. Grambsch (2000). Modeling Survival Data: Extending the Cox Model_. Springer, New York. ISBN 0-387-98784-3.                                                                                                                                                                                          |
| forestplot | Max Gordon and Thomas Lumley (2019). forestplot: Advanced Forest Plot Using 'grid' Graphics. R package version 1.9.<br><a href="https://CRAN.R-project.org/package=forestplot">https://CRAN.R-project.org/package=forestplot</a>                                                                                                                                                                                                                                                                                     |
| mctest     | Imdad, M. U. & Aslam, M. (2018). mctest: Multicollinearity Diagnostic Measures.<br><a href="https://CRAN.R-project.org/package=mctest">https://CRAN.R-project.org/package=mctest</a> , R package version 1.2<br>Imdadullah, M., Aslam, M., and Altaf, S., (2016). mctest: An R Package for Detection of Collinearity among Regressors. The R Journal, 8(2),499—509 <a href="https://journal.r-project.org/archive/2016/RJ-2016-062/index.html">https://journal.r-project.org/archive/2016/RJ-2016-062/index.html</a> |
| MatchIt    | Daniel E. Ho, Kosuke Imai, Gary King, Elizabeth A. Stuart (2011). MatchIt: Nonparametric Preprocessing for Parametric Causal Inference. Journal of Statistical Software, Vol. 42, No. 8, pp. 1-28. <a href="https://doi.org/10.18637/jss.v042.i08">https://doi.org/10.18637/jss.v042.i08</a>                                                                                                                                                                                                                         |
