# Supplementary material for: Persistence of Adverse Drug Reaction-Related Hospitalization Risk Following Discharge
Source: MDPI journal article supplement (doi:10.3390/ijerph19095585), 2022-05-04
Supplement: s1 [file s1]

**Supplementary Material Table S3. External Cause Codes with Frequency  $\geq 5$  at Index <sup>a</sup>**

| Category                                                                                                        | ICD-10-AM codes                                      | Frequency |
|-----------------------------------------------------------------------------------------------------------------|------------------------------------------------------|-----------|
| Antihypertensives                                                                                               | Y517, Y521, Y523, Y524, Y525                         | 347       |
| Anticoagulants                                                                                                  | Y442                                                 | 289       |
| Antineoplastic agents                                                                                           | Y431, Y432, Y433                                     | 229       |
| Opioids                                                                                                         | Y450                                                 | 221       |
| Systemic antibiotics (excluding antifungals)                                                                    | Y400, Y401, Y402, Y403, Y404, Y405, Y406, Y408, 409  | 160       |
| Diuretics                                                                                                       | Y541, Y542, Y543, Y544, Y545                         | 156       |
| Glucocorticoids and synthetic analogues                                                                         | Y420                                                 | 113       |
| Antidepressants                                                                                                 | Y490, Y491, Y492                                     | 111       |
| Antiepileptic and antiparkinsonism agents                                                                       | Y460, Y461, Y462, Y463, Y464, Y465, Y466, Y467, Y468 | 82        |
| NSAIDs (excluding salicylates) <sup>b</sup>                                                                     | Y452, Y453                                           | 80        |
| Antidysrhythmic                                                                                                 | Y520, Y522                                           | 69        |
| Psychotropics (excluding antidepressants)                                                                       | Y493, Y494, Y495, Y496, Y497, Y498, Y499             | 66        |
| Antidiabetic agents                                                                                             | Y423                                                 | 64        |
| Analgesics, antipyretics and anti-inflammatories (excluding NSAIDs and opioids)                                 | Y454, Y455, Y459                                     | 38        |
| Anti-infective and antiparasitic agents                                                                         | Y410, Y411, Y412, Y413, Y414, Y415, Y418, Y419       | 35        |
| Sedatives, hypnotics and anti-anxiolytics                                                                       | Y470, Y471, Y472, Y473, Y474, Y475, Y478, Y479       | 33        |
| Antihyperlipidemic and anti-arteriosclerotic agents                                                             | Y526                                                 | 30        |
| Anesthetic therapeutic gases                                                                                    | Y480, Y481, Y482, Y483, Y484, Y485                   | 26        |
| Antihypertensive AND diuretic (combination)                                                                     |                                                      | 23        |
| Immunosuppressive agents                                                                                        | Y434                                                 | 21        |
| Other and unspecified hormones and their synthetic substitutes                                                  | Y428                                                 | 18        |
| Antiplatelets                                                                                                   | Y444, Y451                                           | 17        |
| Alpha-adrenoreceptor antagonists, not elsewhere classified (excluding ergot alkaloids)                          | Y516                                                 | 14        |
| Analgesics, antipyretics and anti-inflammatories (excluding NSAIDs and opioids) AND opioids (combination)       | Y454, Y455, Y459                                     | 14        |
| Agents affecting calcification                                                                                  | Y547                                                 | 13        |
| Anti-allergic and anti-emetic drugs                                                                             | Y430                                                 | 11        |
| Contraceptives                                                                                                  | Y424, Y425                                           | 9         |
| Other antacids and anti-gastric-secretion drugs                                                                 | Y531                                                 | 9         |
| Agents affecting uric acid metabolism                                                                           | Y548                                                 | 8         |
| Thyroid hormones                                                                                                | Y421                                                 | 7         |
| Other parasympatholytic (anticholinergics and antimuscarinics) and spasmolytic agents, not elsewhere classified | Y513                                                 | 7         |
| Antidepressant AND antiepileptic and antiparkinsonism agent (combination)                                       |                                                      | 7         |

| Category                                                                 | ICD-10-AM codes | Frequency |
|--------------------------------------------------------------------------|-----------------|-----------|
| Antineoplastic AND glucocorticoids and synthetic analogues (combination) |                 | 7         |
| Antithyroid agent                                                        | Y422            | 6         |
| Androgens and anabolic congeners                                         | Y427            | 6         |
| Anticholinesterase agents                                                | Y510            | 6         |
| Peripheral vasodilators and nicotinic acid derivatives                   | Y527            | 6         |
| Antidepressant AND psychotropic (combination)                            |                 | 6         |
| Antidysrhythmic AND antihypertensive (combination)                       |                 | 6         |
| Iron preparations and other anti-hypochromic-anemia preparations         | Y440            | 5         |
| Opioid receptor antagonists                                              | Y501            | 5         |
| Stimulant laxatives                                                      | Y532            | 5         |
| Other laxatives                                                          | Y534            | 5         |
| Anti-asthmatics, not elsewhere classified                                | Y556            | 5         |
| Antidepressant AND antihypertensive (combination)                        |                 | 5         |
| Antidepressant AND opioid (combination)                                  |                 | 5         |
| Antiepileptic and antiparkinsonism agent AND opioid (combination)        |                 | 5         |
| Antihypertensive AND NSAID (excluding salicylates) (combination)         |                 | 5         |

(a) Categories are not mutually exclusive. An external cause code was recorded for 72.5% (2,060/2,843) of ADR-related index admissions.

(b) Nonsteroidal anti-inflammatory drugs (NSAIDs).
