# Supplementary material for: Persistence of Adverse Drug Reaction-Related Hospitalization Risk Following Discharge
Source: MDPI journal article supplement (doi:10.3390/ijerph19095585), 2022-05-04
Supplement: s1 [file s1]

**Supplementary Material Table S1. Du et al. ADR Codes.[1]**

| <b>ICD-10-AM Code</b> | <b>Description</b>                                                   |
|-----------------------|----------------------------------------------------------------------|
| D52.1                 | Drug-induced folate deficiency anemia                                |
| D59.0                 | Drug-induced autoimmune hemolytic anemia                             |
| D59.2                 | Drug-induced nonautoimmune hemolytic anemia                          |
| D61.1                 | Drug-induced aplastic anemia due to chemotherapy                     |
| D64.2                 | Secondary sideroblastic anemia due to drugs and toxins               |
| D68.3                 | Hemorrhagic disorder due to circulating anticoagulants               |
| E03.2                 | Hypothyroidism due to medicaments and other exogenous substances     |
| E06.4                 | Drug-induced thyroiditis                                             |
| E16.0                 | Drug-induced hypoglycemia without coma                               |
| E23.1                 | Drug-induced hypopituitarism                                         |
| E24.2                 | Drug-induced Cushing's syndrome                                      |
| E27.3                 | Drug-induced adrenocortical insufficiency                            |
| E66.1                 | Drug-induced obesity                                                 |
| F11                   | Mental and behavioral disorders due to use of opioids                |
| F13                   | Mental and behavioral disorders due to use of sedatives or hypnotics |
| G21.0                 | Malignant neuroleptic syndrome                                       |
| G21.1                 | Other drug-induced secondary parkinsonism                            |
| G21.2                 | Secondary parkinsonism due to other external agents                  |
| G24.0                 | Drug-induced dystonia                                                |
| G25.1                 | Drug-induced tremor                                                  |
| G25.4                 | Drug-induced chorea                                                  |
| G25.6                 | Drug-induced tics and other tics of organic origin                   |
| G44.4                 | Drug-induced headache not elsewhere classified                       |
| G62.0                 | Drug-induced polyneuropathy                                          |
| G72.0                 | Drug-induced myopathy                                                |
| H26.3                 | Drug-induced cataract                                                |
| H40.6                 | Glaucoma secondary to drugs                                          |
| I42.7                 | Cardiomyopathy due to drugs and other external agents                |
| I95.2                 | Hypotension due to drugs                                             |
| J70.2                 | Acute drug-induced interstitial lung disorders                       |
| J70.3                 | Chronic drug-induced interstitial lung disorders                     |
| J70.4                 | Drug-induced interstitial lung disorders (unspecified)               |
| K85.3                 | Drug-induced pancreatitis                                            |
| L10.5                 | Drug-induced pemphigus                                               |
| L23.3                 | Allergic contact dermatitis due to drugs in contact with skin        |
| L24.4                 | Irritant contact dermatitis due to drugs in contact with skin        |
| L25.1                 | Unspecified contact dermatitis due to drugs in contact with skin     |
| L27                   | Dermatitis due to substances taken internally                        |
| L43.2                 | Lichenoid drug reaction                                              |
| L56.0                 | Drug phototoxic response                                             |

| ICD-10-AM Code | Description                                                                                            |
|----------------|--------------------------------------------------------------------------------------------------------|
| L56.1          | Drug photoallergic response                                                                            |
| L64.0          | Drug-induced androgenic alopecia                                                                       |
| M10.2          | Drug-induced gout                                                                                      |
| M32.0          | Drug-induced systemic lupus erythematosus                                                              |
| M34.2          | Systemic sclerosis induced by drugs and chemicals                                                      |
| M80.4          | Drug-induced osteoporosis with pathological fracture                                                   |
| M81.4          | Drug-induced osteoporosis without pathological fracture                                                |
| M83.5          | Other drug-induced osteomalacia in adults                                                              |
| M87.1          | Osteonecrosis due to drugs                                                                             |
| N14            | Analgesic nephropathy                                                                                  |
| Q86.2          | Dysmorphism due to warfarin                                                                            |
| R50.2          | Drug-induced fever                                                                                     |
| T78.2          | Anaphylactic shock (unspecified)                                                                       |
| T78.3          | Angioneurotic edema                                                                                    |
| T78.4          | Allergy (unspecified)                                                                                  |
| T78.8          | Other adverse effects not elsewhere classified                                                         |
| T78.9          | Adverse effect (unspecified)                                                                           |
| T80.1          | Vascular complications following infusion transfusion and therapeutic injection                        |
| T80.2          | Infections following infusion transfusion and therapeutic injection                                    |
| T80.3          | ABO incompatibility reaction                                                                           |
| T80.5          | Complications following infusion transfusion and therapeutic injection anaphylactic shock due to serum |
| T80.6          | Complications following infusion transfusion and therapeutic injection other serum reactions           |
| T80.8          | Other complications following infusion transfusion and therapeutic injection                           |
| T80.9          | Unspecified complication following infusion transfusion and therapeutic injection                      |
| T88.3          | Malignant hyperthermia due to anesthesia                                                               |
| T88.6          | Anaphylactic shock due to adverse effect of correct drug or medicament properly administered           |
| T88.7          | Unspecified adverse event of drug or medicament                                                        |
| Z03.6          | Observation for suspected toxic effect from ingested substance                                         |

1. Du W, Pearson SA, Buckley NA, et al. Diagnosis-based and external cause-based criteria to identify adverse drug reactions in hospital ICD-coded data: application to an Australia population-based study. Public Health Res Pract. 2017; 27: e2721716.
